# Supplementary material for: Malnutrition, Hypertension Risk, and Correlates: An Analysis of the 2014 Ghana Demographic and Health Survey Data for 15–19 Years Adolescent Boys and Girls
Source: PubMed Central journal article supplement (PMC7551149; doi:10.3390/nu12092737), 2020-09-08
Supplement: nutrients-12-02737-s001.pdf [file nutrients-12-02737-s001.pdf]

## Supplementary Data

1 **Table S1: Decision making score for adolescent males and females in DHS 2014 data**

| Variables                                                            | Sex      |          | 2  |
|----------------------------------------------------------------------|----------|----------|----|
|                                                                      | Female   | Male     | 3  |
| <b>Index of attitude toward wife beating</b>                         |          |          | 4  |
| <i>Wife beating is justified if:</i>                                 |          |          |    |
| 1. Goes out without telling him                                      | √        | √        | 5  |
| 2. Neglects the children                                             | √        | √        | 6  |
| 3. Argues with him                                                   | √        | √        | 7  |
| 4. Refuses to have sex with him                                      | √        | √        | 8  |
| 5. Burns the food                                                    | √        | √        | 9  |
| <b>The maximum attainable score for attitude toward wife beating</b> | <b>5</b> | <b>5</b> | 10 |
| <i>Index of property ownership:</i>                                  |          |          |    |
| 1. Owns a house alone or jointly                                     | √        | √        | 11 |
| 2. Owns land alone or jointly                                        | √        | √        | 12 |
| <b>The maximum attainable score for property ownership</b>           | <b>2</b> | <b>2</b> | 13 |
| <b>Summated empowerment index</b>                                    | <b>7</b> | <b>7</b> |    |

14 **Table S2: Scoring format from responses for decision-making indexes**

| <b>Index of attitude toward wife beating scoring format</b> | <b>Index of property ownership Scoring format</b> |
|-------------------------------------------------------------|---------------------------------------------------|
| No=1                                                        | Does not own=0                                    |
| Yes =0                                                      | Alone only=1                                      |
|                                                             | Jointly only=1                                    |
|                                                             | Both alone and jointly=1                          |

15



**Table S4. Multivariate Predictors of Height-For-Age Z-Score (HAZ) and Body-Mass-Index-For-Age Z-Score (BAZ): A Comparative Analysis for Adolescent Boys and Girls from the 2014 Ghana Demographic Health Survey (GDHS) Data**

| Variables                                           | HAZ             |         |                 |         |                 |         | BAZ             |         |                 |         |                 |         |
|-----------------------------------------------------|-----------------|---------|-----------------|---------|-----------------|---------|-----------------|---------|-----------------|---------|-----------------|---------|
|                                                     | Girls (n=857)   |         | Boys (n=870)    |         | Pooled (n=1727) |         | Girls (n=857)   |         | Boys (n=870)    |         | Pooled (n=1727) |         |
|                                                     | Estimate<br>(β) | S.E (β) | Estimate<br>(β) | S.E (β) | Estimate<br>(β) | S.E (β) | Estimate<br>(β) | S.E (β) | Estimate<br>(β) | S.E (β) | Estimate<br>(β) | S.E (β) |
| Sex                                                 |                 |         |                 |         |                 |         |                 |         |                 |         |                 |         |
| Boy                                                 |                 |         |                 |         | -0.17           | 0.13    |                 |         |                 |         | -0.27**         | 0.14    |
| Girl                                                |                 |         |                 |         | Ref.            |         |                 |         |                 |         | Ref.            |         |
| Age                                                 | -0.08***        | 0.03    |                 |         |                 |         |                 |         |                 |         |                 |         |
| Girl Menstruated in the last 6 weeks                |                 |         |                 |         |                 |         |                 |         |                 |         |                 |         |
| Yes                                                 | 0.41***         | 0.13    |                 |         |                 |         | 0.25**          | 0.12    |                 |         |                 |         |
| No                                                  | Ref.            |         |                 |         |                 |         | Ref.            |         |                 |         |                 |         |
| Adolescent has experienced first sex                |                 |         |                 |         |                 |         |                 |         |                 |         |                 |         |
| Yes                                                 | 0.22***         | 0.07    |                 |         | 0.14***         | 0.04    | 0.18**          | 0.07    | 0.34****        | 0.08    | 0.23****        | 0.05    |
| No                                                  | Ref.            |         |                 |         | Ref.            |         | Ref.            |         |                 |         |                 |         |
| Adolescent has a child                              |                 |         |                 |         |                 |         |                 |         |                 |         |                 |         |
| Yes                                                 |                 |         |                 |         | -0.36***        | 0.13    |                 |         | 0.51**          | 0.26    |                 |         |
| No (Ref.)                                           |                 |         |                 |         | Ref.            |         |                 |         |                 |         |                 |         |
| <b>Interaction term sex* adolescent has a child</b> |                 |         |                 |         |                 |         |                 |         |                 |         |                 |         |
| Girl *Has a child                                   |                 |         |                 |         | -0.39**         | 0.16    |                 |         |                 |         |                 |         |
| Highest educational level of girl                   |                 |         |                 |         |                 |         |                 |         |                 |         |                 |         |
| No education                                        | -0.38**         | 0.16    | 0.29            | 0.22    | -0.10           | 0.13    |                 |         |                 |         |                 |         |
| Primary school                                      | -0.21**         | 0.09    | -0.35****       | 0.10    | -0.26****       | 0.06    |                 |         |                 |         |                 |         |
| Secondary education /Higher                         | Ref.            |         | Ref.            |         | Ref.            |         |                 |         |                 |         |                 |         |
| Ethnicity                                           |                 |         |                 |         |                 |         |                 |         |                 |         |                 |         |
| Akan                                                |                 |         |                 |         | -0.14**         | 0.06    |                 |         |                 |         |                 |         |
| Mole-Dagbani                                        |                 |         |                 |         | 0.05            | 0.07    |                 |         |                 |         |                 |         |
| Other                                               |                 |         |                 |         | Ref.            |         |                 |         |                 |         |                 |         |
| Marital status                                      |                 |         |                 |         |                 |         |                 |         |                 |         |                 |         |
| Currently married                                   |                 |         |                 |         |                 |         | -0.69**         | 0.30    |                 |         |                 |         |

|                                                      |          |         |           |      |          |      |           |         |          |          |           |      |
|------------------------------------------------------|----------|---------|-----------|------|----------|------|-----------|---------|----------|----------|-----------|------|
| Never married                                        |          |         |           |      |          |      | Ref.      |         |          |          |           |      |
| Empowerment score                                    |          |         |           |      | 0.06**   | 0.03 |           |         |          |          | 0.07**    | 0.03 |
| <b>An interaction term for sex*empowerment score</b> |          |         |           |      |          |      |           |         |          |          |           |      |
| Girl * empowerment score                             |          |         |           |      |          |      |           |         |          |          | 0.09**    | 0.03 |
| Water, hygiene and sanitation score                  |          |         | 0.06**    | 0.02 |          |      |           |         |          |          |           |      |
| Household wealth index                               |          |         |           |      |          |      |           |         |          |          |           |      |
| Poorest                                              | -0.21*   | 0.11    | -0.29**   | 0.12 | -0.16    | 0.10 | -0.42**** | 0.11    | -0.21    | 0.13     | -0.33**** | 0.08 |
| Poorer                                               | -0.27*** | 0.11    | -0.43**** | 0.13 | -0.27*** | 0.10 | -0.44**** | 0.11    | -0.37*** | 0.13     | -0.43**** | 0.09 |
| Middle                                               | -0.24**  | 0.12    | -0.30**   | 0.13 | -0.23**  | 0.11 | -0.15     | 0.12    | -0.29**  | 0.14     | -0.22**   | 0.09 |
| Richer                                               | -0.08    | 0.12    | -0.16     | 0.12 | -0.10    | 0.12 | -0.16     | 0.14    | -0.02    | 0.14     | -0.09     | 0.09 |
| Richest                                              | Ref.     |         | Ref.      |      | Ref.     |      | Ref.      |         | Ref.     |          | Ref.      |      |
| <b>An interaction term for Sex *</b>                 |          |         |           |      |          |      |           |         |          |          |           |      |
| <b>Household Wealth Quintile</b>                     |          |         |           |      |          |      |           |         |          |          |           |      |
| Boy* Poorest                                         |          |         |           |      | -0.35**  | 0.15 |           |         |          |          |           |      |
| Boy*Poorer                                           |          |         |           |      | -0.33**  | 0.16 |           |         |          |          |           |      |
| Boy*Middle                                           |          |         |           |      | -0.21    | 0.18 |           |         |          |          |           |      |
| Boy*Richer                                           |          |         |           |      | -0.15    | 0.17 |           |         |          |          |           |      |
| Boy*Richest                                          |          |         |           |      | Ref.     |      |           |         |          |          |           |      |
| Agro-ecological zone                                 |          |         |           |      |          |      |           |         |          |          |           |      |
| Coastal savannah                                     | -0.09    | 0.08    |           |      |          |      |           |         |          |          |           |      |
| Guinea/Sudan savannah                                | 0.19*    | 0.10    |           |      |          |      |           |         |          |          |           |      |
| Forest                                               | Ref.     |         |           |      |          |      |           |         |          |          |           |      |
| <b>Model Fit Statistics</b>                          |          |         |           |      |          |      |           |         |          |          |           |      |
| R-Square                                             | 0.07     | 0.09    | 0.11      |      |          |      | 0.07      | 0.07    |          | 0.17     |           |      |
| Root MSE                                             | 0.85     | 0.88    | 0.87      |      |          |      | 0.85      | 0.78    |          | 0.82     |           |      |
| Model (F-Value)                                      | 3.80**** | 7.49*** | 10.51**** |      |          |      | 6.01****  | 5.63*** |          | 29.38*** |           |      |

Ref, Reference group; \*P≤ 0.1; \*\* P≤0.05; \*\*\*P≤0.01; \*\*\*\* P≤0.001

**Table S5. Multivariate Predictors of Blood Pressure: A Comparative Analysis for Adolescent Boys and Girls from the 2014 Ghana Demographic Health Survey (GDHS) Data**

| Variables                                                            | Systolic blood pressure |         |                 |         |                 |         | Diastolic blood pressure |         |                 |         |                 |          |      |
|----------------------------------------------------------------------|-------------------------|---------|-----------------|---------|-----------------|---------|--------------------------|---------|-----------------|---------|-----------------|----------|------|
|                                                                      | Girls (n=857)           |         | Boys (n=870)    |         | Pooled (n=1727) |         | Girls (n=857)            |         | Boys (n=870)    |         | Pooled (n=1727) |          |      |
|                                                                      | Estimate<br>(β)         | S.E (β) | Estimate<br>(β) | S.E (β) | Estimate<br>(β) | S.E (β) | Estimate<br>(β)          | S.E (β) | Estimate<br>(β) | S.E (β) | Estimate<br>(β) | S.E (β)  |      |
| Sex                                                                  |                         |         |                 |         |                 |         |                          |         |                 |         |                 |          |      |
| Boy                                                                  |                         |         |                 |         | 3.35**          | 1.49    |                          |         |                 |         |                 | -1.56*** | 0.49 |
| Girl                                                                 |                         |         |                 |         | Ref.            |         |                          |         |                 |         |                 | Ref.     |      |
| Age                                                                  |                         |         | 1.37****        | 0.34    | 0.74****        | 0.21    |                          | 0.32*   | 0.17            |         |                 | 0.40**   | 0.17 |
| Adolescent has experienced first sex                                 |                         |         |                 |         |                 |         |                          |         |                 |         |                 |          |      |
| Yes                                                                  | -2.34**                 | 1.09    | 2.89***         | 1.12    | -0.46           | 0.85    |                          |         |                 |         |                 |          |      |
| No                                                                   | Ref.                    |         |                 |         | Ref.            |         |                          |         |                 |         |                 |          |      |
| <b>Interaction term sex* experienced first sex</b>                   |                         |         |                 |         |                 |         |                          |         |                 |         |                 |          |      |
| Girl*experienced first sex                                           |                         |         |                 |         | 3.84***         | 1.26    |                          |         |                 |         |                 |          |      |
| Adolescent has a child                                               |                         |         |                 |         |                 |         |                          |         |                 |         |                 |          |      |
| Yes                                                                  |                         |         | 18.22****       | 1.61    |                 |         |                          |         |                 |         |                 | -2.47**  | 1.10 |
| No                                                                   |                         |         |                 |         |                 |         |                          |         |                 |         |                 |          |      |
| Adolescent exercised in the past 10 minutes                          |                         |         |                 |         |                 |         |                          |         |                 |         |                 |          |      |
| Yes                                                                  | 4.08***                 | 1.47    |                 |         |                 |         |                          |         |                 |         |                 |          |      |
| No                                                                   | Ref.                    |         |                 |         | Ref.            |         |                          |         |                 |         |                 |          |      |
| Ate in the past 10 minutes                                           |                         |         |                 |         |                 |         |                          |         |                 |         |                 |          |      |
| Yes                                                                  |                         |         | 2.55****        | 0.81    | 1.69***         | 0.61    |                          |         |                 |         |                 |          |      |
| No                                                                   |                         |         | Ref.            |         | Ref.            |         |                          |         |                 |         |                 |          |      |
| Had coffee in the past 10 minutes                                    |                         |         |                 |         |                 |         |                          |         |                 |         |                 |          |      |
| Yes                                                                  |                         |         | 6.39****        | 1.23    | -2.49           | 2.22    |                          |         |                 |         |                 | -1.01    | 1.49 |
| No                                                                   |                         |         | Ref.            |         | Ref.            |         |                          |         |                 |         |                 | Ref.     |      |
| <b>An interaction term for sex*had coffee in the past 10 minutes</b> |                         |         |                 |         |                 |         |                          |         |                 |         |                 |          |      |
| Boy * had coffee in the past 10                                      |                         |         |                 |         | 8.32***         | 2.61    |                          |         |                 |         |                 | 7.32**** | 2.15 |

|                                                |         |      |            |      |          |      |  |  |          |           |
|------------------------------------------------|---------|------|------------|------|----------|------|--|--|----------|-----------|
| minutes                                        |         |      |            |      |          |      |  |  |          |           |
| Frequency of fruit intake in the past week     |         |      | 0.32*      | 0.17 |          |      |  |  |          |           |
| Visited a health facility in the last 6 months |         |      |            |      |          |      |  |  |          |           |
| Yes                                            |         |      |            |      |          |      |  |  |          |           |
| No                                             |         |      |            |      |          |      |  |  |          |           |
| Marital status                                 |         |      |            |      |          |      |  |  |          |           |
| Currently married                              |         |      | -21.70**** | 5.88 |          |      |  |  | -4.44*** | 1.67      |
| Formerly married                               |         |      | N/A        |      |          |      |  |  | N/A      |           |
| Never married                                  |         |      | Ref.       |      |          |      |  |  |          |           |
| Household owns land usage for agriculture      |         |      |            |      |          |      |  |  |          |           |
| Yes                                            |         |      |            |      |          |      |  |  | -1.44**  | 0.69      |
| No                                             |         |      |            |      |          |      |  |  | Ref.     |           |
| Household wealth index                         |         |      |            |      |          |      |  |  |          |           |
| Poorest                                        |         |      | 5.84****   | 1.40 | 1.06     | 1.48 |  |  |          |           |
| Poorer                                         |         |      | 1.45       | 1.41 | -0.88    | 1.50 |  |  |          |           |
| Middle                                         |         |      | 1.92       | 1.27 | 1.00     | 1.51 |  |  |          |           |
| Richer                                         |         |      | 1.63       | 1.27 | 0.28     | 1.48 |  |  |          |           |
| Richest                                        |         |      | Ref.       |      | Ref.     |      |  |  |          |           |
| <b>An interaction term for Sex *</b>           |         |      |            |      |          |      |  |  |          |           |
| <b>Household Wealth Quintile</b>               |         |      |            |      |          |      |  |  |          |           |
| Boy* Poorest                                   |         |      |            |      |          |      |  |  |          |           |
| Boy*Poorer                                     |         |      |            |      |          |      |  |  |          |           |
| Boy*Middle                                     |         |      |            |      |          |      |  |  |          |           |
| Boy*Richer                                     |         |      |            |      |          |      |  |  |          |           |
| Boy*Richest                                    |         |      |            |      |          |      |  |  |          |           |
| Agro-ecological zone                           |         |      |            |      |          |      |  |  |          |           |
| Coastal savannah                               |         |      | 1.90**     | 0.93 | 1.07     | 0.69 |  |  |          | -0.52     |
| Guinea/Sudan savannah                          |         |      | -3.48**    | 1.53 | -2.68*** | 0.93 |  |  |          | -2.11**** |
| Forest                                         |         |      | Ref.       |      | Ref.     |      |  |  |          | Ref.      |
| BAZ category                                   |         |      |            |      |          |      |  |  |          |           |
| Underweight                                    | -6.90   | 5.19 | -2.53      | 1.29 | -3.67**  | 1.88 |  |  | -2.98**  | 1.51      |
| Overweight                                     | 2.98*** | 1.02 | 4.71****   | 1.39 | 3.14**** | 0.97 |  |  | 1.98***  | 0.76      |
|                                                |         |      |            |      |          |      |  |  |          | -2.68*    |
|                                                |         |      |            |      |          |      |  |  |          | 1.53      |
|                                                |         |      |            |      |          |      |  |  |          | 0.78      |

|                             |          |           |           |          |      |        |                   |
|-----------------------------|----------|-----------|-----------|----------|------|--------|-------------------|
| Normal weight               | Ref.     | Ref.      | Ref.      |          |      | Ref.   | Ref.              |
| Adolescent is stunted       |          |           |           |          |      |        |                   |
| Yes                         |          | -3.86***  | 1.25      | -3.23*** | 1.09 |        |                   |
| No                          |          | Ref.      |           | Ref.     |      |        |                   |
| Agro-ecological zone        |          |           |           |          |      |        |                   |
| Coastal savannah            |          |           |           |          |      |        | -0.48 0.55        |
| Guinea/Sudan savannah       |          |           |           |          |      |        | -1.97**** 0.61    |
| Forest                      |          |           |           |          |      |        | Ref.              |
| <b>Model Fit Statistics</b> |          |           |           |          |      |        |                   |
| R-Square                    | 0.04     | 0.15      | 0.15      |          |      | 0.01   | 0.02 0.03         |
| Root MSE                    | 9.99     | 10.46     | 10.30     |          |      | 8.01   | 8.05 8.01         |
| Model (F-Value)             | 5.83**** | 35.99**** | 16.76**** |          |      | 4.39** | 3.58**** 5.32**** |

Ref, Reference group; \*P≤ 0.1; \*\* P≤0.05; \*\*\*P≤0.01; \*\*\*\* P≤0.001; BAZ, Body-mass index-for-age Z-score; N/A, not applicable because none of the Boy adolescents was formerly married; N/A, none of the adolescent boys was formerly married
